# Supplementary material for: High-energy-density nonaqueous MnO2@nanoporous gold based supercapacitors
Source: Royal Society of Chemistry journal article supplement (doi:10.1039/c3ta11480e), 2013-01-01
Supplement: c3ta11480e.pdf [file c3ta11480e.pdf]

## Supplementary Information

### **High-energy-density nonaqueous MnO<sub>2</sub>@nanoporous gold based supercapacitors**

L. Y. Chen,<sup>a</sup> J. L. Kang,<sup>a</sup> Y. Hou,<sup>a</sup> P. Liu,<sup>a</sup> T. Fujita,<sup>a</sup> A. Hirata<sup>a</sup> and M. W. Chen<sup>abc\*</sup>

<sup>a</sup> *World Premier International (WPI) Research Center, Advanced Institute for Materials Research, Tohoku University, Sendai 980-8577, Japan*

<sup>b</sup> *CREST, Japan Science and Technology Agency (JST), Saitama 332-0012, Japan*

<sup>c</sup> *State Key Laboratory of Metal Matrix Composites, School of Materials Science and Engineering, Shanghai Jiao Tong University, Shanghai 200030, PR China*

\* Corresponding author. E-mail address: mwchen@wpi-aimr.tohoku.ac.jp

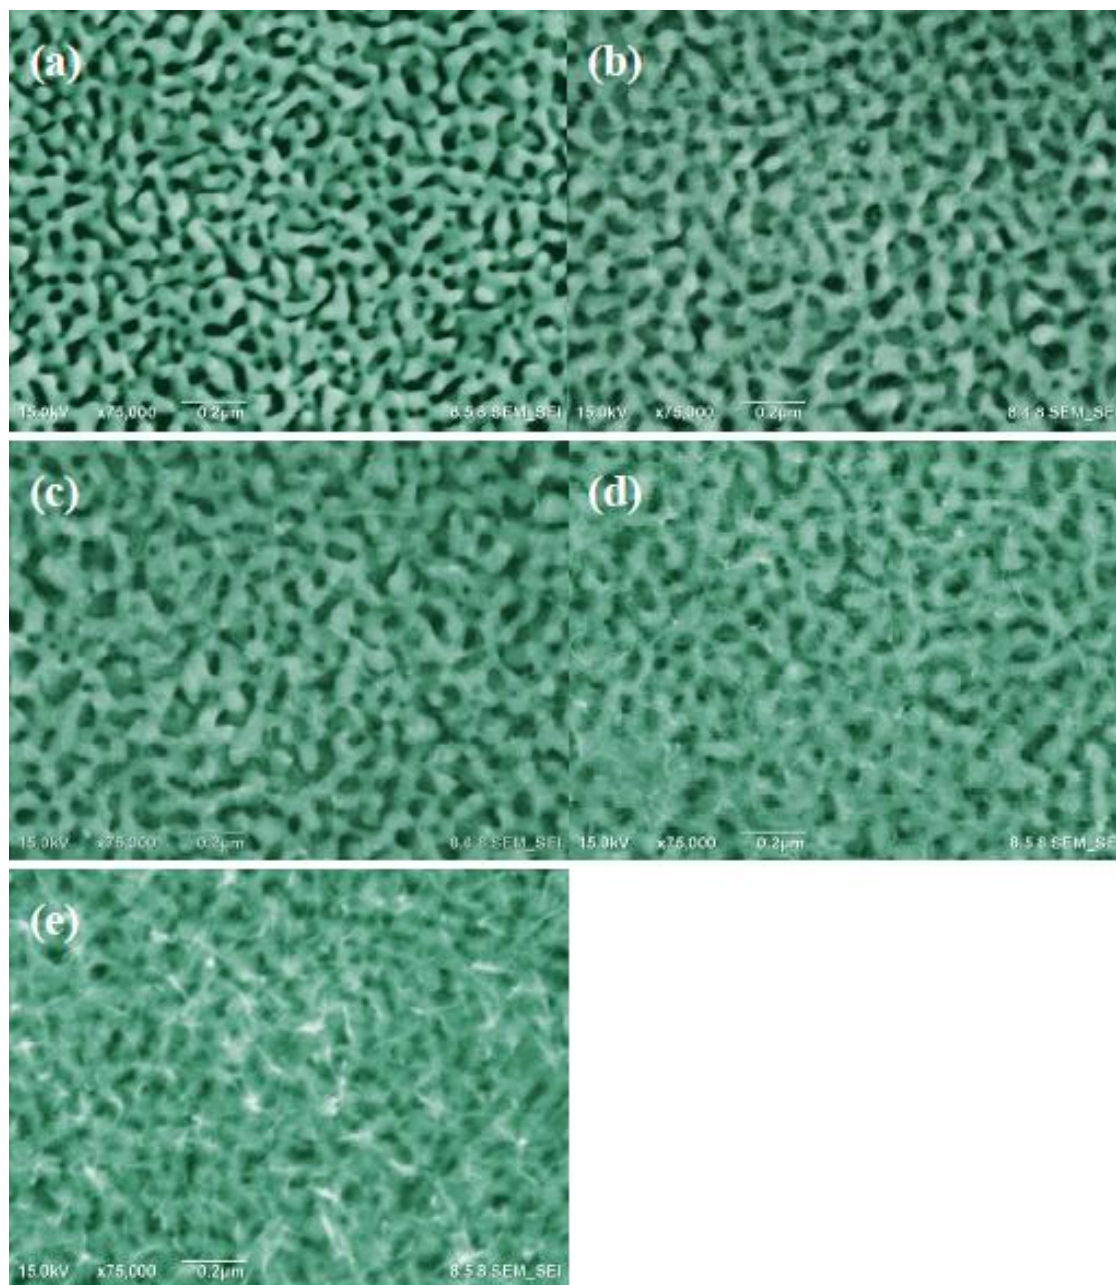

**Fig. S1.** SEM images of (a) pure NPG and (b-e) MnO<sub>2</sub>@NPG with plating time of 2.5, 5, 7.5, 10 min.

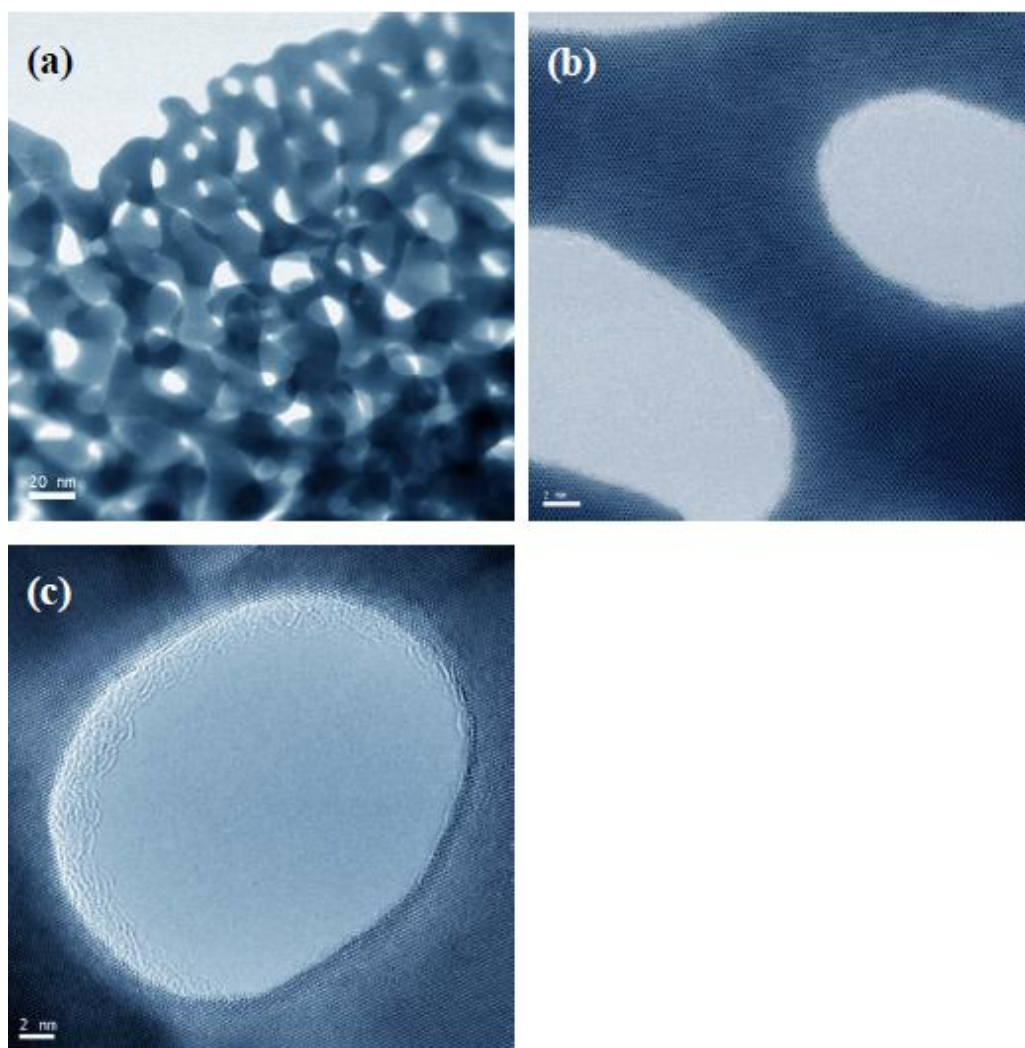

**Fig. S2.** TEM images of (a, b) pure NPG and (c) MnO<sub>2</sub>@NPG with plating time of 0.5 min.

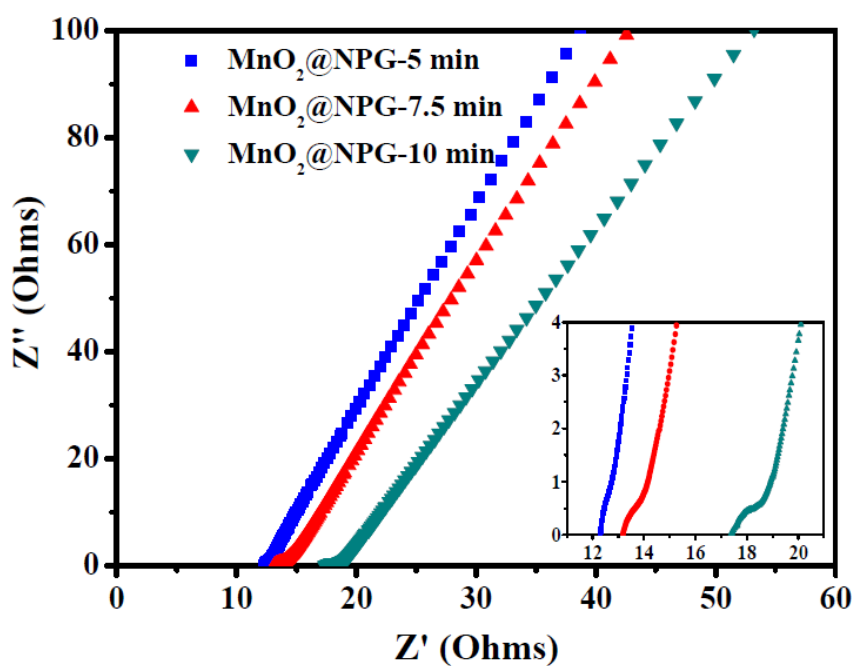

**Fig. S3.** EIS spectra of the MnO<sub>2</sub>@NPG supercapacitors with different MnO<sub>2</sub> loading amounts in the EMI-DCA electrolyte.
